# Supplementary material for: Narrow funnel-like interaction energy distribution is an indicator of specific protein interaction partner
Source: iScience. 2023 May 20;26(6):106911. doi: 10.1016/j.isci.2023.106911 (PMC10250834; doi:10.1016/j.isci.2023.106911)
Supplement: Data S2. Protein structure prediction results using Phyre2.0; related to Figure 1 [file mmc3.xlsx]

## Sheet: Structure prediction result
Uniprot ID	High confidence prediction region (residues, >90% confidence)	Ratio of high confidence prediction region (%, >90% confidence)
P04049	492	76
P01112	181	96
P30279	245	85
P19438	436	96
Q00987	324	66
P04637	322	82
Q8N2W9	397	78
O14920	635	84
P25963	304	96
P21860	966	72
P01133	1013	84
P38936	86	53
Q9HCE7	696	92
Q96A08	121	96
P00533	1016	84
P62993	217	100
P35968	1057	78
P20936	858	82
O15105	298	70
Q12834	374	75
Q14203	1086	85
P11802	296	98
P43403	538	87
P14635	251	58
P98170	372	75
P06493	288	97
Q00534	306	94
Q14653	345	81
P42574	243	88
Q969H0	615	87
Q13049	639	98
P24941	298	100
P50613	342	99
P24864	270	66
O15344	500	75
O14640	410	59
O15111	655	88
Q9Y4K3	438	84
P67775	287	93
Q9UKV5	495	77
Q99816	382	98
P12643	352	89
Q04206	336	61
P04234	145	85
Q96EP1	564	85
Q96J02	614	68
P24385	244	83
P41743	447	75
P51946	274	85
P53350	584	97
Q13490	383	62
P42224	735	98
P50750	338	91
O60563	261	36
P28482	345	96
Q13094	314	59
Q12933	465	93
P45983	380	89
P05412	89	27
P45985	367	92
Q13489	392	65
O14746	905	80
Q14155	562	70
Q9NR28	184	77
Q86YT6	875	87
P16104	127	89
Q13153	294	54
P63000	182	95
P30281	259	89
Q86TM6	413	67
Q14790	450	94
Q13546	281	42
O15392	136	96
P53355	1229	86
Q96PU5	624	64
P48200	885	92
O43187	362	58
P48059	276	85
P37088	381	57
P35226	218	67
P51617	313	44
A6NLU0	272	95
Q8NEG5	329	52
P19174	1109	86
Q5T0T0	157	54
P42081	305	93
Q9NPC3	268	97
Q99558	340	36
P15056	451	59
Q8NHY2	467	64
O43318	327	54
O15524	141	67
P03956	450	96
O75928	366	59
P17181	401	72
P29597	1056	89
P49336	371	80
P68400	336	86
Q7Z419	239	79
Q5VSY0	292	80
O60566	609	58
P36894	329	62
Q8WZ73	286	79
Q13114	505	89
P67870	199	93
P15692	150	65
Q9NW38	337	90
Q9BXW9	1175	81
Q9P2P5	848	54
P07196	515	95
Q99836	269	91
Q9Y4X5	423	76
O60573	213	87
Q8WY64	440	99
P49023	254	43
Q05397	767	73
P45973	179	94
P61586	185	96
P60953	191	100
Q13263	534	64
Q76N89	851	53
P15918	803	77
P27986	695	96
P09619	1006	91
P63104	230	94
Q16539	352	98
O95155	911	70
P54252	227	63
Q969K3	264	71
Q9BVG3	456	96
P18031	300	69
Q96FA3	338	81
Q13158	189	91
Q6UWE0	578	80
P04626	1004	80
Q14164	644	90
Q969Q1	289	82
P12830	784	89
Q02750	357	91
P78317	182	96
Q9H211	305	56
P36406	419	73
P46734	291	84
O00141	340	79
Q9UHC7	265	55
P25490	207	50
Q9UBE8	453	86
P19429	207	99
Q96AX9	830	82
P0C0S8	127	98
O15350	413	65
O43791	325	87
Q9NYJ8	124	18
Q6VVB1	383	97
P16333	358	95
Q14258	472	75
O95278	324	98
Q9P253	875	90
Q9BZY9	378	89
P21675	1441	77
P47989	1306	98
P03372	380	64
Q9BYM8	433	85
Q9NYY3	575	84
O15503	177	64
O75150	830	83
P06213	1257	91
Q16667	178	84
Q9H6Y7	248	71
Q9UHD2	626	86
Q96BI1	424	100
Q06587	316	78
Q99741	459	82
P42772	135	98
P04908	127	98
Q9Y3I1	412	79
O14757	428	90
P30304	172	33
P06239	442	87
Q7RTN6	340	79
Q99496	309	92
P19784	329	94
P51948	309	100
Q8WVD3	222	91
P55061	210	89
P12931	450	84
Q96CA5	295	99
P21580	750	95
P78396	255	55
P20226	183	54
Q9NPB6	214	62
Q9NZJ0	401	55
Q9H0M0	599	65
P26358	1228	76
Q6TDP4	545	85
Q96EP0	771	72
P62805	101	99
Q96QV6	128	98
Q9UKT5	290	75
Q8TEB7	273	64
P52565	199	98
Q149N8	992	59
Q13002	799	88
P24863	263	93
P17252	524	78
O14543	195	87
Q00535	292	100
Q15078	150	49
Q96GD4	333	97
Q96DX5	276	94
Q9UKT8	413	91
O60858	284	70
P15336	111	22
Q15759	349	96
P06400	649	70
P05771	523	78
P14210	647	89
Q96EQ8	227	98
Q15836	96	96
P49841	348	83
O15169	258	30
Q96JY6	295	84
Q9UKA1	656	95
Q9Y286	438	94
Q9P2J3	542	88
P56945	391	45
P12277	373	98
Q9NWZ3	280	61
Q15831	337	78
P27361	344	91
P12004	255	98
Q8IYU2	763	84
Q9UNE0	434	97
Q8WV44	459	73
P30307	170	36
O14508	166	84
P19838	784	81
O95786	925	100
O76064	300	62
Q9P2N7	537	82
Q13418	442	98
P62877	87	81
Q9C035	493	100
P31946	228	93
Q969U6	560	99
P27348	230	94
Q8IYM9	478	96
Q9C040	669	90
Q9Y577	472	99
Q9NQ86	560	77
Q12981	198	87
Q9UII4	798	78
O94979	793	65
Q8IUD6	432	100
O60784	305	62
Q9P2G9	539	87
P22392	150	99
P0C2W1	277	97
P35222	609	78
O00623	208	58
Q14527	756	75
Q9NRD1	251	86
O00635	460	99
Q8TDB6	614	83
O15164	525	50
Q9UJP4	543	91
Q99683	673	49
Q8WU17	385	58
P19419	115	27
P23443	330	63
Q9C026	504	71
Q6PCD5	487	63
P49815	1084	60
O60907	513	89
Q9NQS7	110	12
O75382	669	90
Q9Y2M5	548	90
P11362	320	39
Q8WU20	152	30
Q5XUX0	415	77
P35568	273	22
Q08881	601	97
P10415	172	72
Q96T88	721	91
Q9NZS9	247	55
Q8TCQ1	158	55
Q8N5C8	121	17
Q9H469	285	95
P08581	1195	86
Q13702	395	96
Q96GF1	101	53
Q96PU4	713	89
P00519	463	41
P46109	303	100
Q9UKC9	410	97
P14373	477	93
Q53G59	545	96
P50542	453	71
Q9Y2E6	377	61
Q8NC42	252	63
Q6Q0C0	442	66
O60674	1041	92
Q9HCM9	497	96
Q86XS8	347	83
Q8IZP0	350	69
Q9UKT7	393	92
Q6PCT2	423	61
Q9UK96	764	80
O14964	411	53
P43405	552	87
Q6R327	990	58
O00750	1160	71
O95376	409	83
Q16526	474	81
